# Supplementary material
Source: HighWire-hosted journal article supplement (https://bmjopen.bmj.com/content/15/5/e092068)
Supplement: inline-supplementary-material-1 [file inline-supplementary-material-1.pdf]

Table S1 SPIRIT diagram for the trial

|                                                           |                     | Study Period                    |                    |                |      |      |      |       |                                             |       |
|-----------------------------------------------------------|---------------------|---------------------------------|--------------------|----------------|------|------|------|-------|---------------------------------------------|-------|
|                                                           | Allocation          |                                 | Intervention 1     |                |      |      |      |       |                                             |       |
|                                                           |                     | Intervention2                   |                    | Follow-up      |      |      |      |       |                                             |       |
| Time point                                                | Preoperative Clinic | Waiting for Surgery (1-3 weeks) | Preoperative Day 1 | Day of Surgery | POD1 | POD2 | POD3 | ..... | POD7 (or the day before hospital discharge) | POD30 |
| Enrollment                                                |                     |                                 |                    |                |      |      |      |       |                                             |       |
| Screen for eligibility                                    | O                   |                                 |                    |                |      |      |      |       |                                             |       |
| Informed consent                                          | O                   |                                 |                    |                |      |      |      |       |                                             |       |
| Basic history taking (height, weight, PMH, comorbidities) | O                   |                                 |                    |                |      |      |      |       |                                             |       |
| Randomization and allocation                              | O                   |                                 |                    |                |      |      |      |       |                                             |       |
| Intervention                                              |                     |                                 |                    |                |      |      |      |       |                                             |       |
| Immunonutrition supplement                                | O                   | O                               | O                  |                |      |      |      |       |                                             |       |
| Oral decontamination                                      |                     |                                 | O                  | O              | O    | O    | O    |       |                                             |       |
| Assessment                                                |                     |                                 |                    |                |      |      |      |       |                                             |       |
|                                                           |                     |                                 |                    |                |      |      |      |       |                                             |       |
| Fried phenotype scale                                     | O                   |                                 | O                  |                |      |      |      |       | O                                           |       |

|                                   |   |  |   |   |   |   |   |   |   |   |
|-----------------------------------|---|--|---|---|---|---|---|---|---|---|
| NRS 2002                          | O |  |   |   |   |   |   |   | O |   |
| MMSE                              | O |  |   |   |   |   |   |   | O |   |
| Grip strength                     | O |  | O |   |   |   |   |   | O |   |
| SPPB                              | O |  | O |   |   |   |   |   | O |   |
| Daily METs                        | O |  |   |   |   |   |   |   |   |   |
| Muscle ultrasound                 |   |  | O |   |   |   | O |   |   |   |
| Oral health assessment            |   |  |   |   |   |   |   |   |   |   |
| ROAG                              | O |  |   |   |   |   |   |   |   |   |
| Swallowing function (TOR-BSST)    | O |  |   |   |   |   |   |   |   |   |
| Respiratory assessment            |   |  |   |   |   |   |   |   |   |   |
| SpO2                              | O |  | O | O | O |   | O |   | O |   |
| Pulmonary ultrasound              |   |  | O |   | O |   | O |   |   |   |
| Peripheral blood test             | O |  | O |   |   |   | O |   | O |   |
| Postoperative recovery assessment |   |  |   |   |   |   |   |   |   |   |
| QoR15                             |   |  | O |   | O | O | O |   | O |   |
| WHODAS-II                         | O |  |   |   |   |   |   |   |   | O |
| Functional recovery               |   |  | O |   | O | O | O | O | O |   |

|                          |  |  |  |  |   |   |   |   |   |   |
|--------------------------|--|--|--|--|---|---|---|---|---|---|
| Ward visit for follow-up |  |  |  |  | ○ | ○ | ○ | ○ | ○ |   |
| Telephone for follow-up  |  |  |  |  |   |   |   |   |   | ○ |
